# Supplementary material for: Genomics of Postprandial Lipidomics in the Genetics of Lipid-Lowering Drugs and Diet Network Study
Source: MDPI journal article supplement (doi:10.3390/nu13114000), 2021-11-10

Figure S1. Arachidonic acid, FA (20:4) Manhattan and QQ plot.

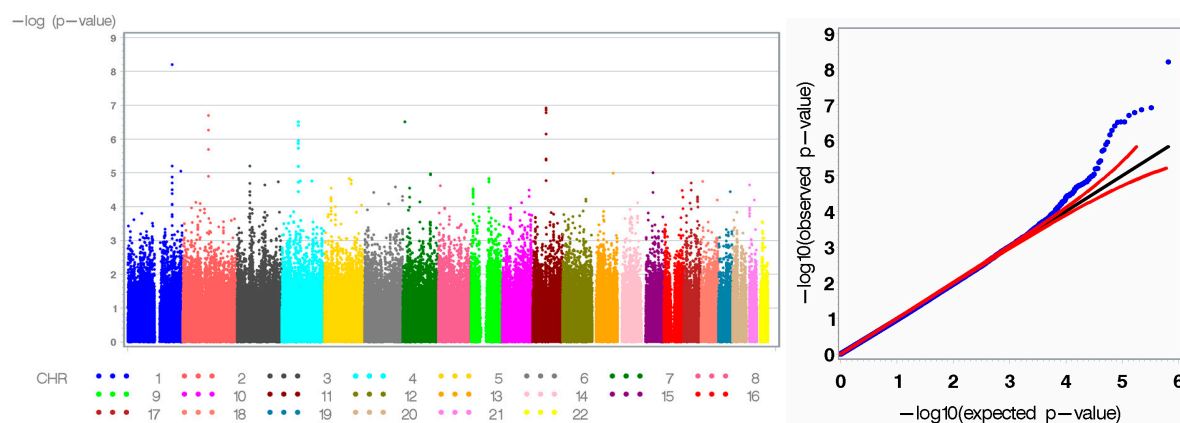

Figure S2. LPE (16:0) Manhattan and QQ plot

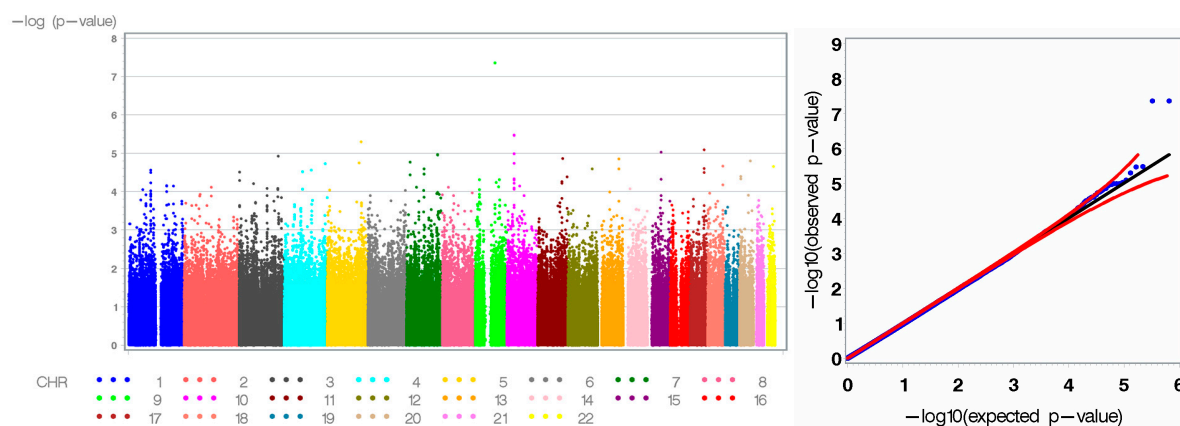

Figure S3. LPE (18:0) Manhattan and QQ plot

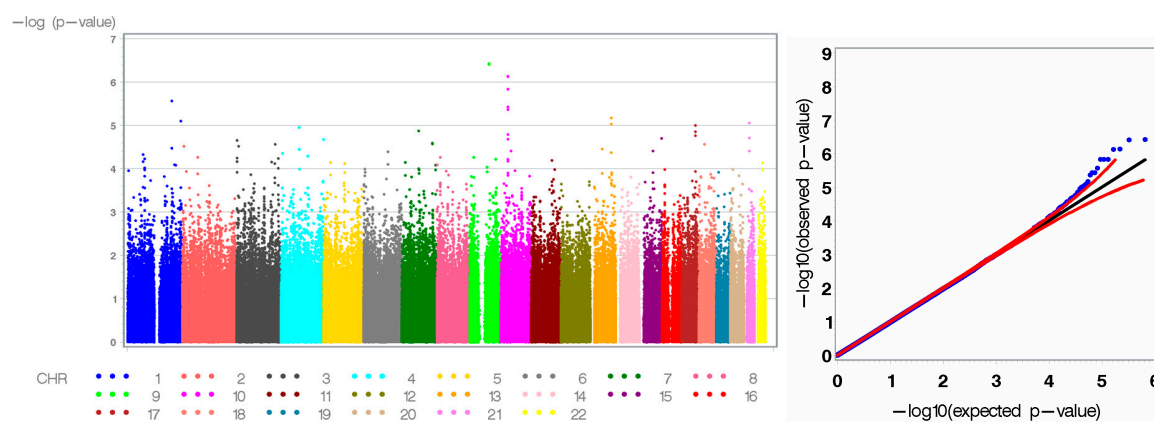

Figure S4. LPE (22:6) Manhattan and QQ plot

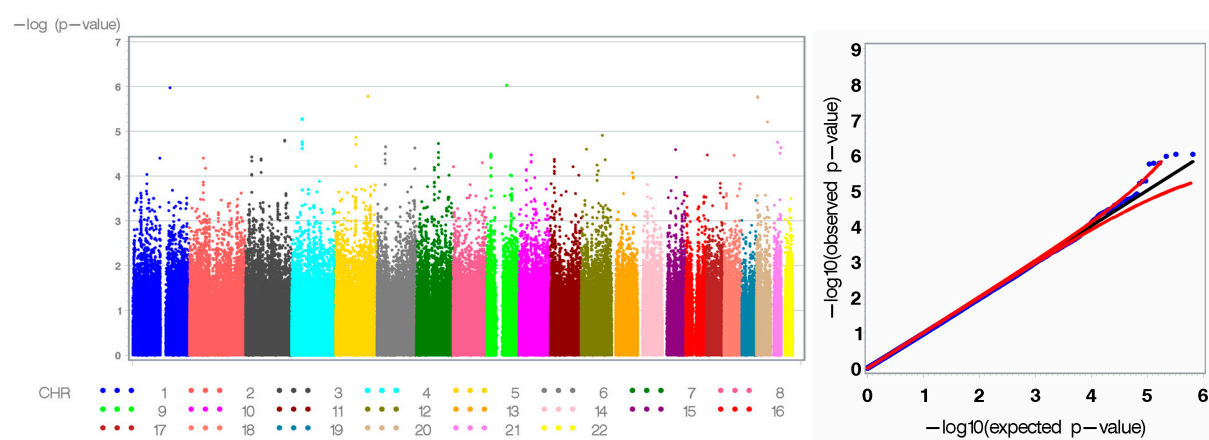

Figure S5. PC (36:5)A Manhattan and QQ plot

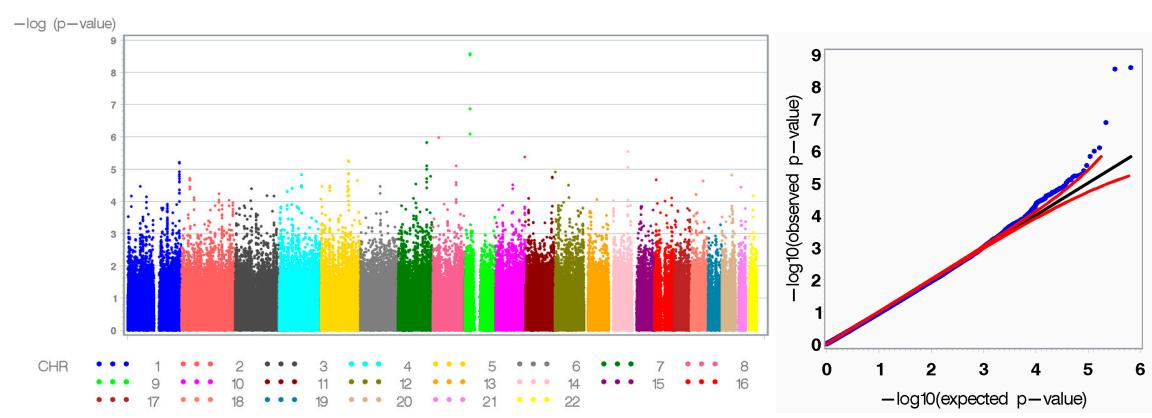

Supplement: s1 [file s1]
